# Supplementary material for: Monitoring Arctic thin ice: A comparison between Cryosat-2 SAR altimetry data and MODIS thermal-infrared imagery
Source: Copernicus journal article supplement (doi:10.5194/tc-2022-98), 2022-05-24
Supplement: Supplementary file [file tc-2022-98-AC4-supplement.pdf]

# Monitoring Arctic thin ice: A comparison between CryoSat-2 SAR altimetry data and MODIS thermal-infrared imagery

Felix L. Müller<sup>1</sup>, Stephan Paul<sup>2,1</sup>, Stefan Hendricks<sup>2</sup>, and Denise Dettmering<sup>1</sup>

<sup>1</sup>Technical University of Munich, Germany; TUM School of Engineering and Design, Department of Aerospace & Geodesy, Deutsches Geodätisches Forschungsinstitut (DGFI-TUM)

<sup>2</sup>Alfred Wegener Institute, Helmholtz Centre for Polar and Marine Research, Bremerhaven, Germany

**Correspondence:** Felix L. Müller (felix-lucian.mueller@tum.de)

**Abstract.** Areas of thin sea ice in the polar regions are not only experiencing the highest rate of sea-ice production but are, therefore, also important hot spots for ocean ventilation as well as heat and moisture exchange between the ocean and the atmosphere. Through co-location of (1) Moderate Resolution Imaging Spectroradiometer (MODIS) derived thin-ice thickness estimates with (2) an unsupervised waveform classification (UWC) approach [applied to CryoSat-2 radar waveforms](#) and (3) Sentinel-1 A/B SAR reference data, thin-ice based waveform shapes are identified, referenced, and discussed with regard to a manifold of waveform shape parameters. ~~Here, a strong linear dependency is found that shows the possibility to either develop simple correction terms for altimeter ranges over thin ice or to directly adjust current retracker algorithms specifically to very thin sea ice.~~ Here, strong linear dependencies are found between binned thin-ice thicknesses up to 25cm thickness from MODIS and the CryoSat-2 waveform shape parameters that show the possibility to either develop simple correction terms for altimeter ranges over thin ice or to directly adjust ~~current retracker algorithms specifically to very thin sea ice.~~ This highlights the potential of CryoSat-2-based SAR altimetry to reliably discriminate between thick sea ice, open-water leads, as well as thin-ice occurrences within recently refrozen leads or mere areas of thin sea ice. Furthermore, a comparison to the [basic](#) ESA Climate Change Initiative's (CCI) ~~surface-type classification~~ [CryoSat-2 surface-type classification with classes](#) reveals that the newly found thin-ice related waveforms are divided up between almost equally between 'unknown' (46.3 %) and lead-type (53.4 %) classifications. Overall, the UWC results in far fewer 'unknown' classifications (1.4 % to 38.7 %). Thus, UWC provides more usable information for sea-ice freeboard and thickness retrieval while UWC at the same time reduces range biases from thin-ice waveforms processed as regular sea ice in the CCI classification.

## 1 Introduction

Areas of thin sea-ice cover in the polar regions play an important role for sea-ice production ~~as well as the ventilation~~ and heat exchange of the ocean with the atmosphere – especially during polar night ~~time~~ (e.g., Meier et al., 2014; Morales Maqueda et al., 2004; Maykut, 1978; Thorndike et al., 1975). Several studies investigated the ~~distribution and occurrence frequencies~~ [the presence](#) of thin sea ice in sea-ice leads and sea-ice polynyas within the Arctic (e.g., Rothrock et al., 1999; Preußner et al., 2016; Preußner et al., 2019; Tian-Kunze et al., 2014; Huntemann et al., 2014; Willmes et al., 2010; Willmes and Heinemann, 2015, 2016; Reiser et al., 2020). [Leads and polynyas are openings of varying size and shape between drift and per definition of the World](#)

25 Meteorological Organisation (WMO) may consist of open water areas but also thin ice with a thickness of up to 30 cm (WMO, 2014). The studies investigating thin ice ~~using~~use different sensors and retrieval methodologies. ~~However, that the resulting data sets~~ are generally bound to an upper sea-ice thickness limit ~~in their retrieval capabilities as well as~~and methodological limitations (e.g. snow cover and/or cloud-cover presence when using thermal-infrared data (e.g., Yu and Rothrock, 1996; Frey et al., 2008) or the spatial resolution using passive-microwave data (e.g., Tamura et al., 2008)).

30 In contrast, satellite altimetry is capable of retrieving sea-ice freeboard and sea-ice thickness for the Arctic on a basin-scale using CryoSat-2 and its predecessor sensors, with several data products already available (e.g., Landy et al., 2019; Paul et al., 2018; Guerreiro et al., 2017; Kurtz et al., 2014). However, studies suggest a higher uncertainty towards thinner sea-ice (Ricker et al., 2017). This is the result of several factors. The radar backscatter characteristics between young and thin sea ice is ambiguous with open-water area, since both surfaces have specular reflection properties that ~~are also prone to~~ lead to off-

35 nadir reflection biasing the radar range (e.g., Aldenhoff et al., 2019; Passaro et al., 2018; Rinne and Similä, 2016). However, classifying radar waveform echoes by their respective backscattering surface type (i.e., sea ice, open ocean, or leads) is essential for the upstream process of retrieving sea-ice freeboard and sea-ice thickness using satellite radar altimetry (e.g., Laxon, 1994; Laxon et al., 2003; Peacock and Laxon, 2004). Numerous studies exist on the automatic detection of leads. These use altimeter data (e.g., Lee et al., 2018; Dettmering et al.; Wernecke and Kaleschke, 2015) or SAR images (e.g., Park et al., 2020; Boulze et al., 2020). A lead in the context of radar altimetry is an ice-free opening surrounded by sea ice that allows to directly measure sea surface height within the ice cover. This converted surface height estimates from sea-ice type and lead-type waveform echoes Continuous sea surface height observations over open ocean and at discrete lead locations are then interpolated along the track and one can subsequently calculate the sea-ice freeboard (i.e., the instantaneous height differences between the sea-ice surface and the ocean surface). However, none of the existing studies has yet attempted to detect thin-ice using satellite altimetry data. Assuming

45 hydro-static equilibrium and utilizing additional auxiliary information on sea-ice type and respective sea-ice density, as well as information on the sea-ice snow cover, one can calculate the sea-ice thickness (e.g., Paul et al., 2018; Alexandrov et al., 2010). ~~But even when a radar waveform is correctly classified as sea ice, the small freeboard values of young ice are often lower than the precision of even the later synthetic aperture radar (SAR) altimeter sensors.~~ For correct sea-ice classifications, the small freeboard values of thin ice (here defined as sea ice with a thickness up to 25 cm) are often lower than the precision of even the recent synthetic aperture radar (SAR)

50 altimeter sensors. In addition, freeboard estimates ~~over~~of sea ice ~~for~~from Ku-Band radar altimeters must be adjusted for a lower wave propagation speed in the snow layer (Mallett et al., 2020). In the absence of a direct observation for each radar altimeter waveform, snow depth and density information may originate from a climatology, modelled snow depth with re-analysis as input or data fusion of different satellite sensors. However, all approaches provide an average snow depth for a certain period and region, which will overestimate the snow layer on young sea ice in most cases and create a freeboard bias ~~since the range~~

55 ~~correction depends on snow depth.~~

Hence, there is currently a need for additional satellite products or physical waveform models to better understand retrievals based on radar altimeter waveforms over thin-ice areas to complement improvements for thicker and rougher sea ice surfaces (e.g., Landy et al., 2019).

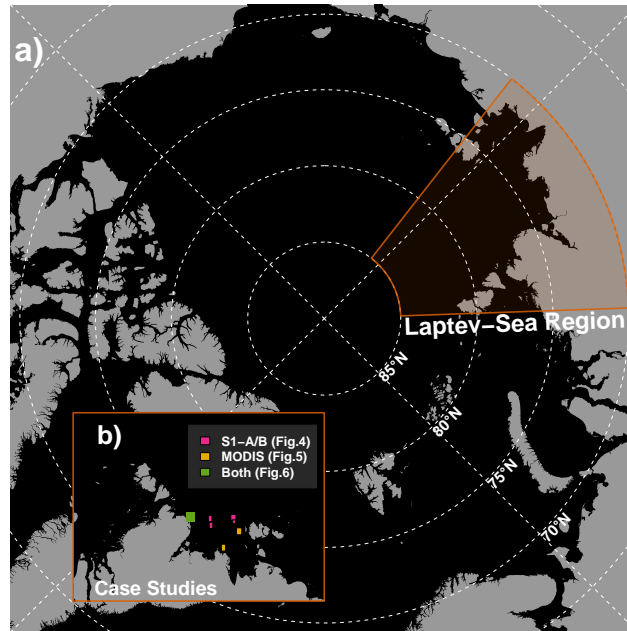

**Figure 1.** Overview of the study area within the Arctic Laptev-Sea region (a; orange outline). Small rectangles within the map inlet (b) mark the locations of case studies used in this study (see Figures 4 to 6).

While information on the presence of thin-ice areas is important for our understanding on sea-ice mass balance changes, there is currently only a single operational Arctic-wide thin-ice data product available due to the above-mentioned short-comings and limitations. This product is based on the ESA's Soil Moisture and Ocean Salinity (SMOS) mission (Tian-Kunze et al., 2014) based on the ice-thickness dependency of surface emissivity at L-Band, however. However, at a lower spatial resolution of  $12.5 \text{ km} \times 12.5 \text{ km}$ . This method is limited for thicker sea ice (above 1m) and thus data fusion of SMOS and CryoSat-2 using Optimal Interpolation (Ricker et al., 2017) is routinely used to improve sea-ice thickness retrieval over the full range of the sea-ice thickness distribution. Data products utilizing thermal-infrared data to estimate thin-ice thickness and corresponding areas are also available, but not in a similar operational fashion (e.g. Preußner et al., 2016; Preußner et al., 2019).

In this study, the authors utilize Delay-Doppler radar altimeter echoes from ESA's Earth Explorer mission CryoSat-2 in combination with the capabilities of NASA's Moderate Resolution Imaging Spectroradiometer (MODIS) to monitor thin ice with a high spatio-temporal resolution to enable future monitoring of thin ice with a high spatial-temporal resolution. This allows for a better understanding of the received CryoSat-2 waveform returns over thin sea-ice areas and, subsequently, an improved surface-type classification. For this task, the authors inter-compare CryoSat-2 waveforms labelled as thin ice through an unsupervised classification approach (extended from Müller et al. (2017)) with thin-ice thickness estimates from MODIS (Paul et al., 2015) within a maximum of 30 minutes between both acquisitions. Additionally, in a subsection, the authors show a statistical analysis of the results obtained by the unsupervised classification approach (Müller et al. (2017)) and the classification used in the ESA Climate Change Initiative (CCI) described in Paul et al. (2018).

All investigations are performed for the Arctic Laptev-Sea region featuring frequent occurrences of flaw and coastal polynyas, i.e., polynyas bound to fast ice or the coast, respectively (Fig. 1; e.g. Preußner et al., 2019; Willmes et al., 2010) and cover the winter months January through March between 2011 and 2020.

~~This study is structured into the following subsections: Section 2 describes all the data sets used followed by Section 3 providing details on the employed unsupervised clustering for CryoSat-2 as well as the MODIS thin-ice thickness retrieval. Finally, Section 4 summarizes and discusses the study's results and implications on CryoSat-2 surface-type classification and sea-ice thickness estimation and concludes with an outlook (Section 5).~~

This study is structured into the following sections: Section 2 describes the data sets; Section 3 provides details on the unsupervised clustering for CryoSat-2 and the MODIS thin-ice thickness retrieval. Section 4 summarizes and discusses the results and implications on CryoSat-2 surface-type classification, and Section 5 concludes with an outlook.

## 2 ~~Dataset~~ Data sets and pre-processing

The following sub-section ~~highlights all~~ highlight the main data sets used for this study. All analyses are carried out for the Arctic Laptev Sea region between 92 °E to 142 °E and 70 °N to 85 °N (see Fig. 1) for the winter months January through March between 2011 and 2020.

### 2.1 CryoSat-2 Level-1B Baseline-D data

CryoSat-2 was launched in April 2010 aiming at the monitoring of the Earth's cryosphere, in particular, the thinning of sea ice and the rise of sea levels in the polar seas. CryoSat-2 was placed on a non-Sun-synchronous orbit with a long repeat orbit of about 369 days. ~~Moreover,~~ CryoSat-2 is carrying a Ku-Band radar altimeter and is observing the cryosphere in three different acquisition modes up to a latitude of 88 ° (Scagliola, 2013). The acquisition modes vary with application area and surface type with respect to a geographical mode mask (more information see: <https://earth.esa.int/eogateway/instruments/siral/description>).

The polar seas, ~~mainly characterized by a seasonally changing sea-ice cover,~~ are predominantly sampled by the Synthetic Aperture Radar (SAR) mode showing with an along-track footprint size of about 300 meters (Wingham et al., 2006). Briefly summarized, the SAR mode combines frequency-shifted radar returns (i.e. Doppler effect) in the direction of flight from different look angles with respect to a predefined position on the surface. The result of combining different view angles is called multi-look waveform and samples the surface with 20Hz resolution ~~(about 250 m along-track resolution).~~

The present investigation is based solely on SAR-mode acquired multi-looked waveforms, covering major parts of the Arctic Ocean. In particular, CryoSat-2 L1B Ice Baseline D data are introduced to the processing chain. This data set comprises in addition to the waveform data, also information on waveform scaling as well as orbit positions. More information regarding Baseline D can be found in the ESA CryoSat-2 Product Handbook (Bouzinac (2019)) and Meloni et al. (2020).

### 2.2 MODIS data

~~As basis~~ For the comparison of thin-ice thickness to CryoSat2 waveform returns, ~~Moderate Resolution Imaging Spectroradiometer (MODIS)~~ MODIS Level 1B calibrated radiances are obtained from both ~~MODIS sensors on board the polar-orbiting~~ NASA satellites, Terra and Aqua



(MOD/MYD02; MODIS Characterization Support Team (MCST), 2017a, b; retrieved from the Level-1 and Atmosphere Archive and Distribution System (LAADS) Distributed Active Archive Center (DAAC) with a spatial resolution of  $1\text{ km} \times 1\text{ km}$  at nadir and swath dimensions of  $1354\text{ km}$  (across track)  $\times$   $2030\text{ km}$  (along track).

110 ~~In a first step,~~Brightness temperatures were calculated from the calibrated radiances comprising MODIS channels 31 and 32 following Toller et al. (2009). Subsequently, the ~~sea-ice-surface-temperatures (IST)~~IST was computed following Riggs and Hall (2015). All MODIS processing is based on MODIS Collection 6.1 data for nighttime only.

In order to compute corresponding thin-ice thickness data from the IST data, additional data on the prevailing atmospheric conditions are necessary. Here, all necessary atmospheric fields are provided from the European Centre for Medium-Range  
115 Weather Forecast (ECMWF) ReAnalysis V5 (ERA5) data acquired from the Copernicus Climate Data Store (CDS; Hersbach et al., 2020). These fields comprise the 2 m air temperature, the 10 m wind-speed components, the mean sea-level pressure, and the 2 m dew-point temperature in hourly resolution.

## 2.3 Sentinel-1A/B SAR images

Sentinel-1A and Sentinel-1B were launched in 2014 and 2016, respectively, and orbit the Earth  $180^\circ$  apart on a six-day repeat  
120 cycle in a two-satellite configuration. ~~For an improved understanding of the CryoSat-2/MODIS comparison the authors utilize images from the side-looking ESA Copernicus C-Band SAR missions Sentinel-1A and B (S1-A/B)~~For a better understanding of the CryoSat-2/MODIS comparison, images from the side-looking ESA Copernicus C-Band SAR missions Sentinel-1A and B (S1-A/B) are used for a visual comparison since they are unaffected by cloud cover. ~~All acquired S1-A/B scenes were used for additional visual comparison as they are unaffected by cloud cover.~~ Furthermore, S1-A/B features a higher spatial resolution with regard to MODIS and, therefore, provide  
125 further information about different sea-ice-surface types by making use of the backscattering properties of different surfaces in the ice covered ocean. For instance, leads and polynyas appear very dark due to a very flat and less rough surface. In this case the incoming radar signal is scattered away from the receiver. However, caution must be taken by the interpretation of the backscattering pixel values in the presence of small scale features like frost flowers (i.e small ice crystals with a size of few centimeters in diameter) that develop under cold and calm conditions, e.g. on nilas ice, as they can significantly increase the  
130 scattering resulting in brighter pixel values (Hollands and Dierking, 2016). Furthermore, brighter pixel values can also result from a roughened water surface due to strong wind influence in polynyas. More information regarding sea-ice-surface-type interpretation can be found in Dierking W. (2013) and Murashkin et al. (2018).

~~Sentinel-1A and Sentinel-1B were launched in 2014 and 2016, respectively, and orbit the Earth  $180^\circ$  apart on a six-day repeat cycle in a two-satellite configuration.~~ In the present study, the Sentinel-1 comparison dataset consists of Level-1 dual-polarized SAR extra-wide-swath  
135 mode data at medium resolution. The images are ground-range detected and show a pixel resolution of  $40\text{ m} \times 40\text{ m}$  and a swath width of  $400\text{ km}$ . The spatial resolution is close to  $100\text{ m}$ . The images are processed using the SNAP - ESA Sentinel Application Platform v8.0, (<http://step.esa.int>) following the processing steps described in Müller et al. (2017) and Passaro et al. (2018), but with an additional speckle filtering. Briefly summarized, the main processing steps follow standard routines (e.g. radiometric calibration, speckle filtering, map projections etc.).

140 The Level-1 data is gathered from the Alaska Satellite Facility Data Active Archive Center (ASF DAAC). In terms of study area and period, the S-1A/B image pool represents a theoretical size of approximately 500 scenes.

### 3 Methods

The following section focuses on the key steps of data processing that enable a comparison of thin-ice observations from SAR altimetry and MODIS thermal-infrared imagery. In order to reduce the influence of rapid changing environmental conditions  
145 such as sea ice drift, rapid melt as well as freezing periods, the maximum time gap between altimetry, thermal-infrared imagery and SAR imaging is set to  $\pm 30$  minutes around the overflight times of CryoSat-2. This is a compromise to minimize observation situation changes, while at the same time keeping enabling a sufficiently large MODIS as well as SAR image database. This is necessary due to the frequent presence of cloud cover in the MODIS data. After setting a maximum permissible acquisition time difference between CryoSat-2 and Sentinel-1A/B, the number of possible SAR images is reduced to 52. Other limiting  
150 factors concern the actual number of overlap points in the image area. The images shown in Section 4.1 correspond to examples with a very good overlap and different surface conditions.

The MODIS comparison database ~~used~~ includes 161 scenes, which corresponds to an altimetry dataset of about 21300 CryoSat-2 altimeter observations (MODIS scenes and their time difference from the CryoSat-2 observations are given out in a list upon request). ~~The number of usable observation pairs of both missions is dependent on cloud-free conditions, the processed thin-ice area and the~~  
155 ~~availability of SAR mode data from CryoSat-2.~~

#### 3.1 CryoSat-2 thin-ice classification

Müller et al. (2017) developed an unsupervised classification of altimeter waveforms that was primarily focused on the detection of open water targets, such as leads and polynyas, without the use of training data or pre-known information about the surface conditions. The classification can be applied to any kind of altimeter waveforms and missions. Müller et al. (2017)  
160 applied it to the LRM non-SAR, conventional altimeter missions Envisat and SARAL. Later, the classification approach was adopted to SAR altimeter waveforms (Dettmering et al.) and applied to CryoSat-2 and Sentinel-3A/B in the framework of the European Space Agency's Baltic+ Sea Level (ESA Baltic SEAL) project (Passaro et al., 2021). However, none of these studies ~~has~~ classified thin-ice, since altimeter waveforms generated by this surface type are quite similar to open water returns.

Briefly summarized, the unsupervised waveform classification (UWC) is based on an automatic clustering of a broad spectra  
165 of different waveforms by K-medoids (e.g. Celebi (2014)) defining a reference model with a certain number of clusters. After clustering, ~~next classification steps consist of~~ an assignment of the clustered waveforms as well as remaining waveforms to certain surface types (e.g. ocean, lead/polynya or sea-ice conditions) is performed. The assignment of the waveform clusters to the different surface types is mainly based on the use of background knowledge about the physical backscattering properties of the individual surface types and statistical relationships (see Figure 2). More detailed explanations of the cluster assignment can  
170 be found in Müller et al. (2017). In the present investigation, the cluster number is set to 25. ~~Following~~ This number was found to produce optimal results in Dettmering et al., ~~using this number and let there to~~ an overall agreement of about 97 % ~~can be achieved.~~

Moreover, an internal miss-classification rate of 1.13 % can be expected after performing a 10-fold cross validation (Passaro et al., 2020).

Main input to the classification approach are parameters derived from the waveform shapes and information on the backscatter power. Altogether, they span the ~~so-called~~ feature space, which is defined as followed (see Dettmering et al.):

- **Maximum power (MP)** - physical backscatter coefficient  $\sigma_0$  at the waveform maximum
- **Waveform width (Wwidth)** - number of waveform range bins with a power greater than 1% of the waveform maximum
- **Leading edge slope (LES)** - number of waveform range bins between the position of the waveform maximum and the bin of the leading edge, which is the first exceeding 12.5% of the maximum power
- **Trailing edge slope (TES)** - similar to LES, but for the trailing edge of the waveform
- **Waveform decay (Wdecay)** - estimation of the decay by fitting an exponential function to the trailing edge
- **Waveform fit Median-Absolute Deviation (WfitMAD)** - derived MAD value of the residuals from the fit of the exponential function

Moreover, in the quantitative comparison (Sec. 4.2) two additional features ~~are included, which are not used for the UWC~~ are included. The additional features are part of the [CryoSat-2 waveform classification approach](#) (Paul et al., 2018) [applied in the framework of ESA CCI](#):

- **Leading edge width (LEW)** - width in range bins between 95% and the first bin at the leading edge exceeding 5% of the waveform maximum power using a ten-time over-sampled and smoothed waveform (Hendricks et al., 2021)
- **Leading edge peakiness (LEP)** - computation of the pulse-peakiness (Peacock and Laxon, 2004), but three range bins left from the bin position of the waveform maximum (Ricker et al., 2014)

Figure 2 shows the assignment of 25 clusters to 5 different surface types (compared to 4 in the original UWC approach): undefined, sea ice, thin-ice, lead, and ocean. Clusters characterized by a very strong ~~maximum-power (MP)~~ MP, a small ~~waveform width (Wwidth)~~ Wwidth and strong decay obtained by the fitting of an exponential function to the trailing edge of the waveform are labeled as lead clusters (i.e. 5, 10, 14). Clusters that were formerly assigned to sea ice are now divided into two groups (sea ice and thin ice) based on their different reflective properties. Following Ulander et al. (1995) and Onstott and Shuchman (2004) thin ice covers nilas and young ice ranging from 0 m to 0.30 m and is often covered by a flat layer of slush, which are ice crystals saturated with salt brine. Members of thin-ice clusters show characteristics in between ~~of~~ lead clusters and clear sea-ice groups. They are characterized by a wider waveform shape, a weaker waveform decay and flatter trailing edge slope than lead clusters. Moreover, they also have a slightly weaker ~~maximum-power~~ MP than radar returns reflected from open, calm water (Zyguntowska et al., 2013). These properties correspond to clusters 4 and 19.

"Undefined" waveform clusters represent waveforms which cannot assigned unambiguously to certain surface conditions, for example if they are acquired in the direct vicinity of the coast or islands. They also show a bigger standard deviation compared to other clusters.

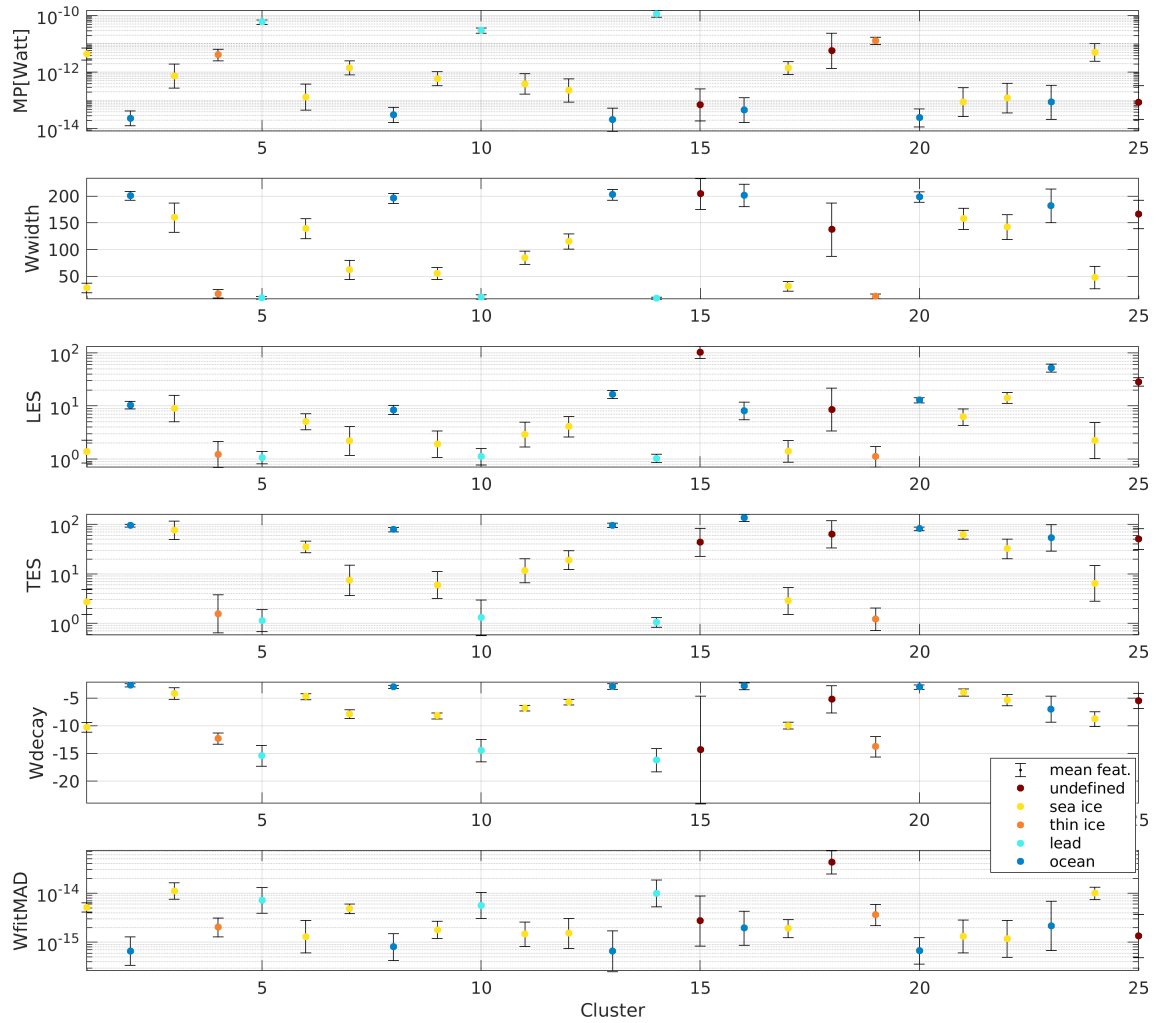

**Figure 2.** Averages and standard error of 6 waveform features used per cluster: Maximum Power (MP); Waveform Width (Wwidth); Leading-Edge Slope (LES); Trailing-Edge Slope (TES); Waveform decay (Wdecay) and median absolute deviation of fitted waveform (WfitMAD). Colors indicate 5 different surface types: *undefined* (brown), *sea ice* (yellow), *thin ice* (orange), *lead* (cyan) and *ocean* (blue).

### 3.2 MODIS thin-ice thickness retrieval

205 In order to compute the thin-ice thickness (TIT) from MODIS ~~ice-surface temperatures (IST)~~IST a simple surface-energy-balance model is employed, which utilizes the inversely proportional relation between IST and the thickness of thin sea ice (Yu and Rothrock, 1996; Drucker et al., 2003). In the model, the net positive flux towards the atmosphere (i.e., positive corresponding to the direction from the warm ocean to the cold atmosphere) is equalized from the conductive heat flux through the ice. From this conductive heat flux, TIT is derived following Equation 1, where  $TIT$  is the thin-ice thickness,  $\kappa_i$  is the thermal conductivity

210 of sea ice ( $2.03 \text{ W(m K)}^{-1}$ ),  $IST$  and  $T_{fp}$  are the ~~ice-surface temperature~~ $IST$  and the ice/ocean-interface temperature (assumed to be at the freezing point temperature of the ocean), respectively, and  $Q_{atm}$  is the total heat flux to the atmosphere.

$$TIT = \kappa_i \times \frac{IST - T_{fp}}{Q_{atm}} \quad (1)$$

A detailed description of the TIT retrieval procedure as well as all necessary equations and related assumptions are thoroughly described in Paul et al. (2015). ~~For ice thicknesses between 0.0 and 0.2 m, Adams et al. (2012) state an average uncertainty of~~  
 215  ~~$\pm 4.7 \text{ cm}$ , substantially improving for larger thickness ranges~~While no state-of-the-art uncertainty analysis is available for our combination of MODIS thin-ice retrieval with ERA5 atmospheric reanalysis, Adams et al. (2012) state an average uncertainty of  
 ~~$\pm 4.7 \text{ cm}$  for ice thicknesses between 0.0 and 0.2 m using NCEP2 reanalysis~~ Kalnay et al. (1996), substantially increasing for larger thickness ranges. Figure 3 exemplifies the underlying IST with its corresponding TIT. With regard to these uncertainty limitations in combination with the desire to maximize CryoSat-2/MODIS overlaps, all thin-ice thickness analyses are limited  
 220 to a maximum sea-ice thickness of 25 cm.

## 4 Results and discussion

In this study, a combination of 161 MODIS swaths covering the Laptev-Sea area showing TIT up to 25 cm and about 21300 classified CryoSat-2 observations are used for a quantitative analysis. ~~The spatio-temporal very high resolution altimetry~~The very high  
~~spatio-temporal resolution altimetry~~ observations are related to the respective MODIS pixels using a nearest-neighbor approach. Moreover, Sentinel-1A/B SAR images serve as an additional source for visual comparisons. The first part of this section shows visual comparisons between CryoSat-2 and MODIS as well as Sentinel-1. The second part (Section 4.2) will then focus on a quantitative analysis of the results. In the last part, Section 4.3 briefly evaluates the representation of thin-ice-class waveforms in other CryoSat-2 based products (Paul et al., 2018) compared to the unsupervised classification approach.  
 225

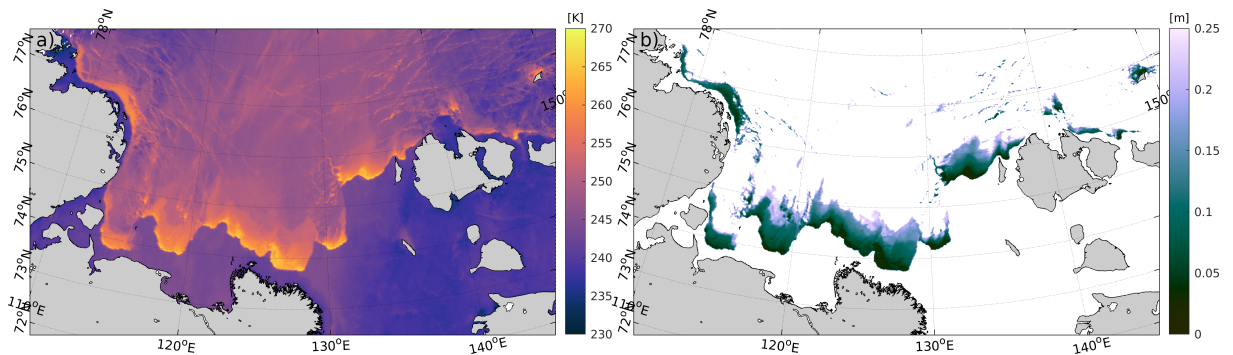

**Figure 3.** Example of MODIS ice-surface temperature (IST in K; a) and its associated thin-ice thickness (TIT; b) between 0 m and 0.25 m; acquired on 05-03-2011 at 18:10 UTC.

## 4.1 Visual comparison

230 This section provides an initial visual inter-comparison between CryoSat-2 classified open-water/leads, thin-ice, and sea-ice observations on the one hand and either MODIS (Table A1) or Sentinel-1A/B SAR imagery (Table A2) on the other hand. Moreover, comparison with operational SMOS products are performed.

Figure 4 shows four ~~zoomed-in snippets~~subsets of two HH-polarized SAR images from February 2018 with their respective classification results from CryoSat-2 superimposed on them. Both SAR images feature at least one lead, which are recognized by the classification algorithm and highlighted by the cyan dots. Orange labels indicate thin-ice observations in the vicinity of leads and correspond to higher SAR backscatter values. Within the image, the areas appearing in light gray to almost white with their lead-like pattern represent former open water areas that have recently frozen over. These areas of new ice can range in thickness from 10 cm to 30 cm (Onstott and Shuchman, 2004) and are often covered by a layer of slush (Ulander et al., 1995). The CryoSat-2 classification results agree reasonably well with the SAR images, however, not all thin ice surfaces and leads are always correctly detected (e.g. Fig. 4 c,d). Potential reasons for this are two-fold: From the SAR point of view, a complete interpretation of the SAR pixel values is not possible ~~and, therefore, no truth is available~~. From the altimetry point of view, off-nadir effects , such as when a dominant and specular lead is not in the nadir direction, may overlay clear leads or thin-ice radar echoes, which hence prevents a clear identification, in particular if the lead or thin-ice surface is very small ,i.e. less than 1% of the illuminated surface (Drinkwater, 1991). These off-nadir effects can become noticeable in the waveform by the appearance of further dominant peaks in the backscatter signal, which later can lead to deviations in the height determination if a retracking algorithm specially modified for this problem is not used (see e.g. Quartly et al. (2019)). Since the observations are very close together in time, differences due to ice movement or over-freezing can be excluded.

A visual comparison between MODIS TIT estimates and thin-ice assigned CryoSat-2 radar echoes are provided by Figure 5. Both sets of images are recorded in January 2014 and 2017, respectively. White areas to the North indicate either a lack of data due to present cloud cover or an ice-thickness estimate above 25 cm. Towards the South, thin-ice areas are bounded by either the coast line and/or the extensive presence of landfast sea ice (Preußer et al., 2019; Selyuzhenok et al., 2015; Dmitrenko et al., 2005). Northwards, leaving the respective coast-line or fast-ice edges, MODIS TIT features a rather steady increase ~~in ice thickness~~. The respective CryoSat-2 classification generally agrees with respect to the MODIS TIT, showing primarily lead and thin-ice classifications. Qualitatively, the respective classifications appear within expectations, in particular with lead classifications close to the coast-line or fast-ice associated ice edge in the South where the sea ice is thinnest and thin-ice classifications further North, where MODIS features thicker thin-ice estimates (see Figure 5, c,d). ~~However, a direct distinction between thicker sea-ice and thin-ice areas is not possible due to the coarse pixel resolution of MODIS in comparison to CryoSat-2~~However, in most cases a direct distinction between thicker sea-ice and thin-ice areas is not possible due to the coarse pixel resolution of MODIS and the variability of ice thickness within a MODIS pixel in comparison to CryoSat-2 which leads to the fact that on one MODIS TIT pixel can fall up to 3 CryoSat-2 observations. Nevertheless, a general connection between thin-ice-labeled radar returns in the direct vicinity of thin sea-ice can be recognized. This relationship is investigated more deeply ~~in a quantitative analyses~~ using the full MODIS database.



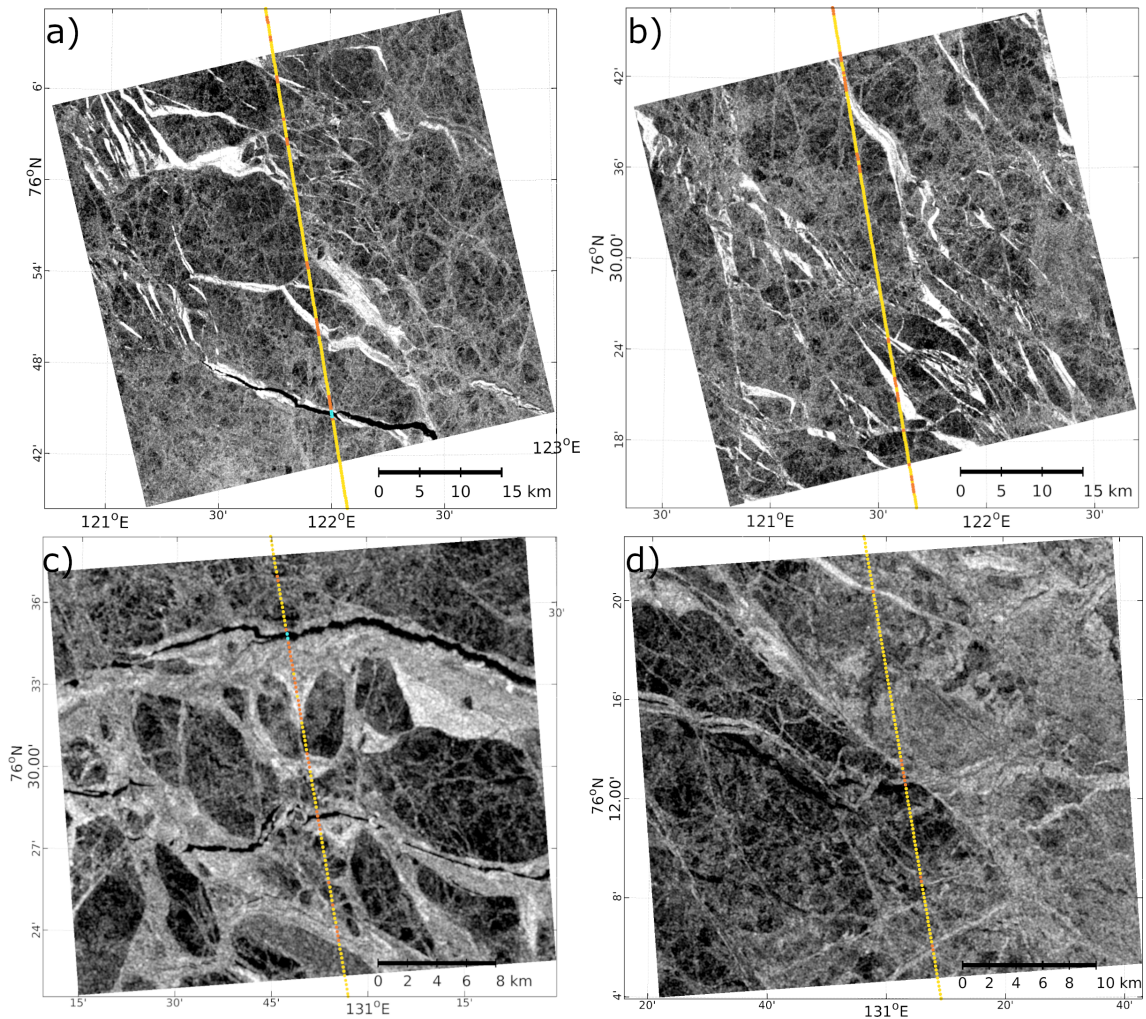

**Figure 4.** Examples of classified CryoSat-2 observations versus HH-polarized Sentinel-1B (a,b) and Sentinel-1A (c,d) snapshots from February 2018 with acquisition time gaps of about 2 minutes and 1 minute, respectively. Orange markers show thin-ice classifications. Leads are labeled in cyan, sea ice in yellow. Figures are north-oriented.

Figure 6 displays a CryoSat-2, MODIS, and Sentinel-1A comparison acquired at from 01 March 2018 featuring an acquisition time gap within 17 minutes from each other (more details can be found in the Appendix). This gives the very rare opportunity to  
 265 analyse observations of all three sensors within a 30 minutes time frame. It shows the different behaviour and dependencies of optical and microwave sensors with respect to different sea-ice surfaces and their physical properties (e.g. surface roughness).

The scene shows very thin-ice close to the landfast-ice edge near Taimyr in the Northeastern part of the Laptev-Sea region (Dmitrenko et al., 2005; Selyuzhenok et al., 2015). The polynya observed by MODIS appears very bright in the SAR image and is supposedly likely caused by a rougha high sea-ice surface roughness, potentially due to, e.g., the presence of frost flowers



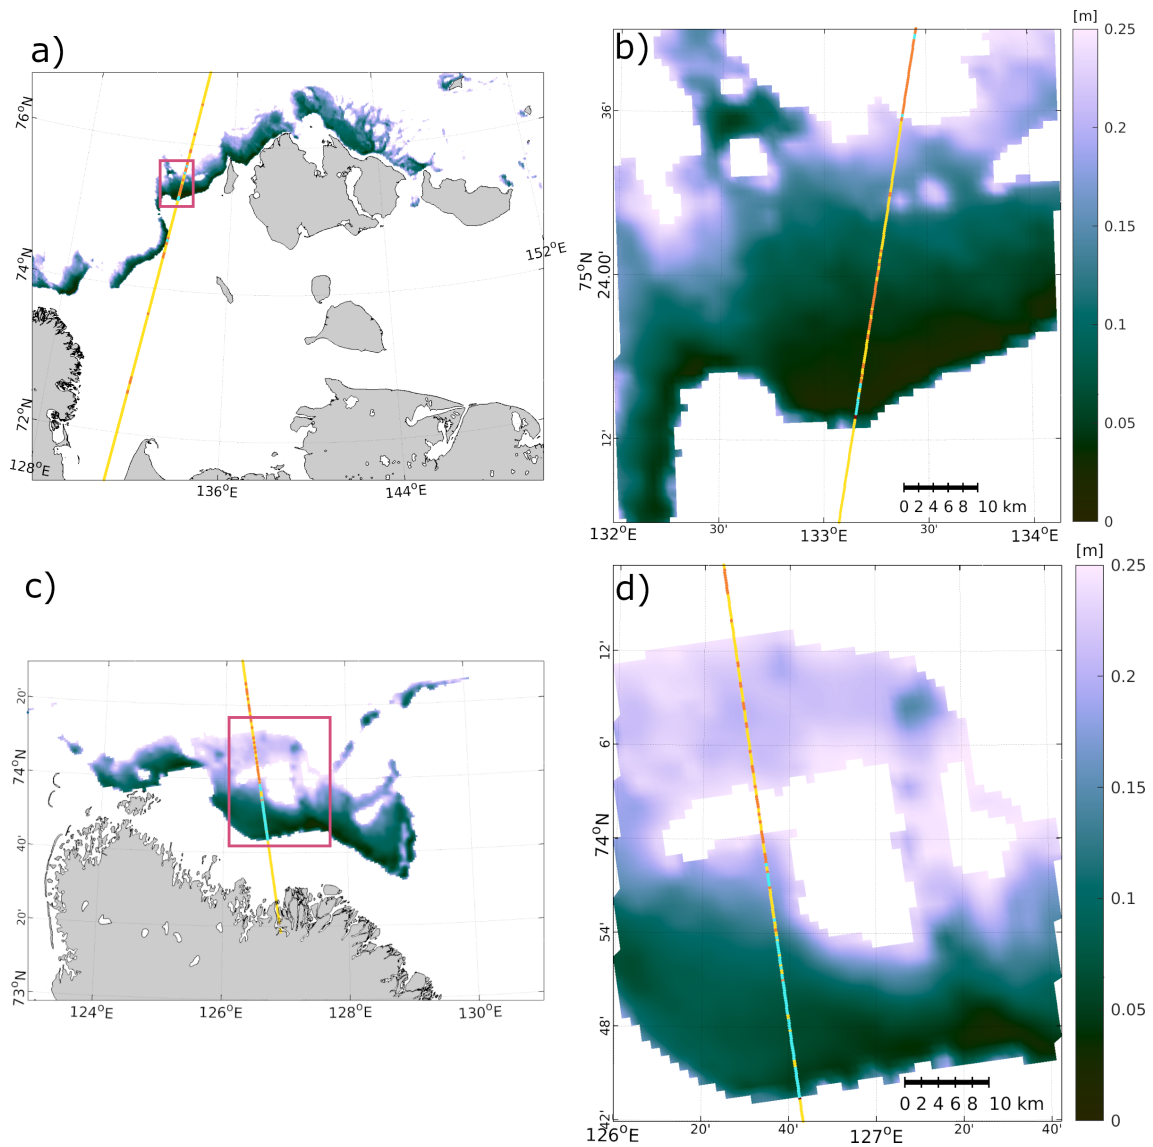

**Figure 5.** Examples of classified CryoSat-2 observations versus MODIS TIT acquired in January, 2014 (a,b) and January, 2017 (c,d), respectively. The left side shows an overview, whereas a detailed view, indicated by the purple rectangle, is given on the right side. Orange markers show thin-ice classifications. Leads are labeled in cyan, sea ice in yellow. Figures are north-oriented.

270 (Hollands and Dierking, 2016; Dierking W., 2013) or surface waves. In contrast to the impact this has on the side-looking SAR, the increased in diffuse surface scattering results in a reduced backscattering power leading to a noisy radar reflection wider wave- form with smaller peak power for the nadir-looking CryoSat-2. We note here, that this change in waveform properties can be caused by a change roughness at radar wavelength scale or large scales, e.g. by ice deformation. It is unlikely that larger areas covered solely by thin sheet ice have significant surface height variability nor a considerable snow layer. But is has been

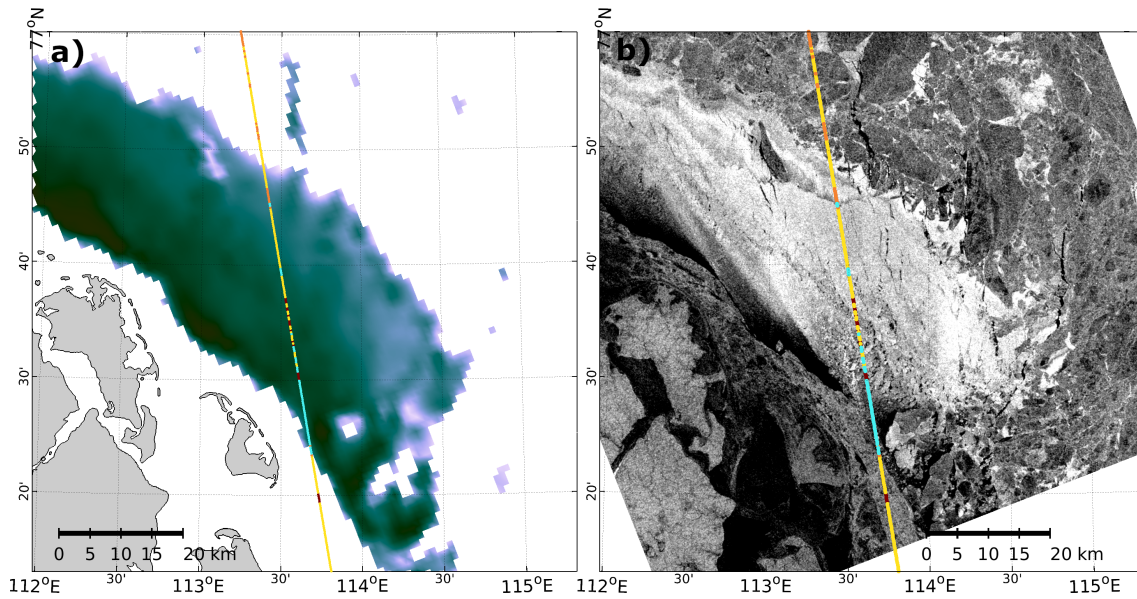

**Figure 6.** Examples of classified CryoSat-2 observations versus MODIS TIT (a) and Sentinel-1A SAR (b) for the same location within a time gap of 7 minutes (MODIS) and 24 minutes (Sentinel-1A) w.r.t CryoSat-2, respectively. Orange markers show thin-ice classifications. Leads are labeled in cyan, sea ice in yellow. Red dots indicate undefined classification. Figures are north-oriented.

275 shown by Landy et al. (2020) that the increase of radar scale roughness can significantly affect CryoSat-2 waveform shape even for comparably flat surfaces when incoherent backscatter from radar scale roughness is taken into account. This results in a false assignment of sea ice within the classification scheme This effect may be so pronounced that several waveforms are assigned to the sea ice category in an area where the SAR image indicates the presence of thin ice only. However, the low backscatter region to the Southeast (dark in the SAR image) featuring very thin ice are labeled correctly again as lead. While the CryoSat-2

280 unsupervised classification performs in general really well, it was primarily developed to identify open water within sea-ice conditions. Hence, a clear distinction between thin and thick sea ice is not always possible due to a high variability of surface roughness of thin-ice. This comparison showcases how substantially the sea-ice surface can vary within small spatial scales but at the same time the enormous potential and synergies for sea-ice investigations that lies within these multi-sensor collocations.

For further visual comparison, SMOS-derived sea-ice thicknesses (Tian-Kunze et al., 2014) are acquired through the sea-ice portal data portal (<https://www.meereisportal.de>) and blended compared to with CryoSat-2 classified waveforms.

285

SMOS-derived sea ice thickness depicts daily composites with a reference time of 12:00:00Z, therefore, CryoSat-2 passes of  $\pm 12$  hours around this reference time are selected. In order to account for the much coarser spatial resolution of  $12.5 \text{ km} \times 12.5 \text{ km}$  for SMOS, CryoSat-2 classifications (up to 42 observations) are aggregated into bins with a length of 12.5 km. This is done once for the fraction of CryoSat-2 thin-ice classifications as well as for the fraction of CryoSat-2 classifications of either thin-

290 ice and lead. Due to the low spatial resolution, this type of comparison is of course not ideal. However, SMOS-derived sea-ice thickness is to date the only operational product delivering reasonable thin-ice thickness estimates.

Two SMOS comparisons from March 2014 and March 2017 during the occurrence of large polynyas in the Laptev Sea show good agreement between thin-ice areas, but also leads (Fig. 7). For example, a larger proportion of lead observations are found in areas featuring very thin ice. CryoSat-2 thin-ice classifications are predominantly found in areas up to a SMOS-derived ice thickness of 25 cm. However, thin-ice observations are also frequently present in areas with thicker ice according to the SMOS data. This is likely a result of the comparable low resolution of the SMOS data, being unable to fully resolve fine lead structures as well as the long aggregation period of the SMOS data over a full day. This long aggregation period tends to reduce the impact of fast-growing very thin sea ice. Vice versa, CryoSat-2 sea-ice classifications are also present in SMOS thin-ice areas. The reason for this stems from the fact that the thin-ice classification of CryoSat-2 is mainly focused on recently frozen or re-frozen leads (i.e., single-peak like waveforms).

Overall, the rapidly changing environmental conditions in the Arctic region and the high sea-ice growth rates, especially for very thin ice during winter, make a detailed comparison and interpretation difficult. Especially, since the SMOS sea-ice thickness data represent only an averaged/aggregated snapshot over a full day, this likely results in a smoothing effect in particular for the thinnest sea-ice fractions. Therefore, a quantitative comparison with SMOS-derived sea-ice thickness is not considered further.

## 4.2 Quantitative analysis

For the quantitative analysis, a total of about 21300 CryoSat-2 observations are compared with MODIS TIT observations in the Laptev Sea for the winter months January through March between 2011 and 2020. This corresponds to about 4 % of the theoretically available matched MODIS vs. CryoSat-2 along-track observations (total circa: 540,000). The small percentage of matches used is explained by 1) the frequent presence of cloud cover in the Arctic, as well as 2) the availability of large flaw polynya openings with corresponding thin-ice surfaces, which occur near the landfast sea-ice edge.

In total, 14 % of all 21300 classifications were assigned to thin-ice surfaces and 1 % to leads. The largest proportion is attributed to thicker sea-ice (85 %). With respect to valid overlaps (i.e. MODIS pixels with TIT information), about 51 % of CryoSat-2 classifications are assigned to open water and thin-ice, while 45 % are assigned to other sea-ice types. Remaining waveforms are marked as "undefined", e.g., due to the influence of land or instrument errors.

Besides a comparison of the CryoSat-2 classification results and the ~~thin-ice-thickness~~ TIT from MODIS, the relationship between waveform-derived backscatter power as well as other waveform-shape properties and different ~~thin-ice-thickness~~ TIT categories is of peculiar interest. Therefore, the ~~thin-ice-thickness~~ TIT data from MODIS is grouped into intervals of  $\pm 2$  cm from 4 cm to 25 cm. These groups are then compared to ~~spatiotemporally~~ corresponding CryoSat-2 radar waveforms, in particular, with the six waveform-derived features used in the classification and two additional waveform parameters (i.e. LEW and LEP) listed in Section 3.1.

Figure 8 shows the per-bin averages of the 8 waveform features with their respective standard deviations indicated as gray bars in the background. With the exception of LES, there is a linear (or close to linear) dependency present w.r.t. an increasing ~~thin-ice-thickness~~ TIT.

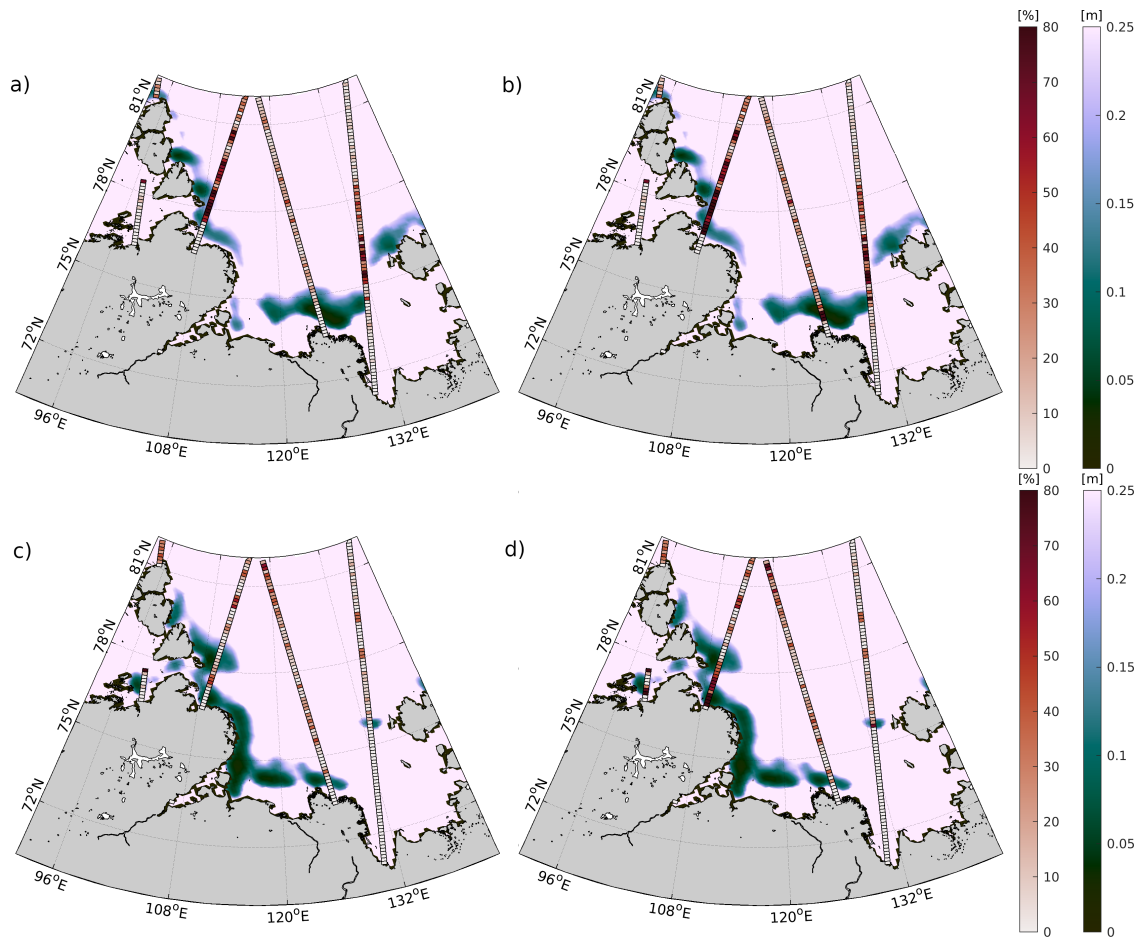

**Figure 7.** Percentage of thin-ice only (a,c) and thin-ice + lead (b,d) classifications per bin (length 12.5 km) with SMOS sea ice thickness limited to 25 cm from 2014-03-23 (a,b) and 2017-03-30 (c,d) in the background. Figures are north-oriented.

325 This is especially evident in waveform features MP, Wwidth, and TES that are intended to characterize single-peak wave-  
forms (e.g. radar reflections by a lead). Despite a very large standard deviation in the thinner ice-class bins, an increase with  
rising ice thickness is a physically explainable behaviour. In general, a rougher surface corresponds to an increase of surface  
scattering resulting in a diminishing return back to the sensor and at the same time an increase of received off-nadir scatter-  
ing by the sensor. This leads to a broadening of the received waveform as well as a drop in maximum waveform power (e.g.  
330 Drinkwater, 1991; Laxon, 1994) and, therefore, to the observed negative correlation with MP and the positive correlations with  
TES and Wwidth.

However, in the case of LES, which is the number of bins between the first waveform bin reaching 12.5 % and the bin of the  
waveform's maximum power (MP) (Dettmering et al.), this linear relationship cannot be spotted. This might be due to an enhanced  
error budget in the first two thin-ice thickness groups. This might be due to a larger uncertainty associated with the first two TIT bins and

335 [their in general lower occurrence rates compared the thicker thin-ice bins](#) or higher uncertainties in the LES processing related to very steep leading edges. Only the latter part, starting with the  $\pm 12$  cm bin features the expected behaviour.

The remaining four waveform features, i.e., Wdecay, WfitMAD, LEW, and LWP, feature an apparent correlation, however, it is less clear than the ones we observed with MP, Wwidth, and TES. [The Pearson linear correlation coefficients are listed in the Appendix \(Table A3\)](#). Similar to TES, physically one would expect a slower/smaller decay with an increase in surface roughness and therefore sea-ice thickness as well as an increase in the width of the leading edge (LEW, Landy et al., 2019) from thinner to thicker ice classes. ~~Contrariwise~~In contrast, the ~~leading-edge peakiness (LEP)~~[LEP](#) is expected to decrease with an increasing ~~leading-edge width~~[LEW](#) going along with an increase surface roughness. The mean-absolute deviation from the fitted exponential fit to the waveforms is also decreasing for broader waveforms that result from addition received backscatter from off-nadir areas due to an increased surface roughness.

345 Nevertheless, this comparison provides information on how different thin-ice scenarios affect the altimeter waveform. The shown dependencies between TIT and derived waveform parameters can be used, e.g., to adapt and optimize altimeter waveform classifiers to thin-ice conditions and subsequently improve the sea-ice freeboard estimation in areas of frequently present thin ice.

### 4.3 Classification Comparison

350 We compare the surface type classification with the CryoSat-2 surface classification described in Paul et al. (2018) to assess how thin-ice-class waveforms are represented in other CryoSat-2 based products. The classification by Paul et al. (2018) was developed for the CryoSat-2 contribution to the sea-ice-thickness data record of the ESA Climate Change Initiative (Hendricks et al., 2018), hereafter named CCI classification. The algorithm is also used in the AWI CryoSat-2 sea-ice product v2.4 (Hendricks et al., 2021) which provides the necessary temporal coverage for this study. We use Level-2 intermediate (I2i) data, which provides the surface-type flag for full resolution orbit data for the months of October through April from November 2010 to April 2021 for the Arctic Laptev sea regions (Fig. 1). The flags in the I2i files are based on monthly thresholds for the backscatter coefficient sigma0, the ~~leading-edge width~~[LEW](#), and pulse peakiness as well as supported by sea-ice-concentration data ([OSI-450 and OSI-430-b of the Ocean and Sea Ice Satellite Application Facility](#)) as sea-ice mask. The surface types used in Paul et al. (2018) are comparable to this study except for the missing thin-ice class and the fact that the ocean-waveform classification solely depends on the sea-ice mask and existing land/ocean flags.

360 The surface-type classification is based on approximately 26.5 million waveforms. The CCI classification lists 50.2 % of these in the sea ice category, 10.9 % in the lead category, 38.7 % in the unknown, and less then 0.1 % in the ocean category (Fig. 9a). Compared to the CCI classification, the unsupervised waveform classification algorithm (UWC) of this study has more sea ice (79.7 %, +29.2 %) and ocean (3.9 %, +3.89 %) waveform, as well as less lead-type (1.9 %, -9 %) and unknown waveforms (1.4 %, -37.3 %) in addition to the 13.0 % thin-ice waveforms (Fig. 9b). The classification matrix (Fig. 9c) shows that the UWC thin-ice waveforms are mostly distributed in CCI unknown (46.3 %) and CCI lead (53.4 %) surface types with a negligible contribution of CCI sea-ice waveforms (0.3 %). UWC lead classifications are almost exclusively (96.8 %) in the



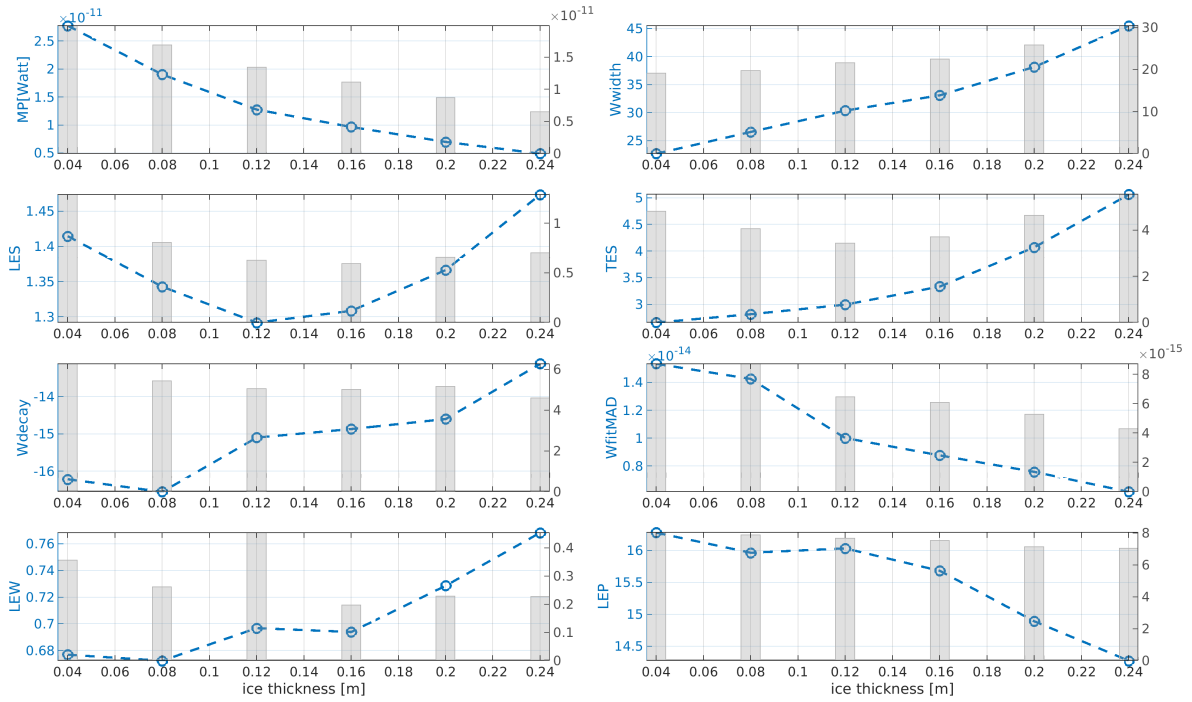

**Figure 8.** Waveform-derived shape and power features from unsupervised classification plus two external features Leading-Edge-Width (LEW; Hendricks et al. (2021)), Leading-Edge-Peakiness (LEP; Ricker et al. (2014)) with respect to different thin-ice thickness categories. Shown are the averaged feature values (blue dotted line) and the corresponding standard deviation (gray bar) per thin-ice thickness groups of  $\pm 2$  cm from 2 to 25 cm. Abbreviations of waveform features used in classification are explained in Fig.2

CCI lead class, showing a good agreement in the identification of open-water leads. UWC sea-ice classification also has a good agreement with CCI sea-ice classifications (61.9 %) but also include waveforms the CCI algorithm labels as unknown (35.6 %).

Between the two surface type classifications algorithms, the UWC results in far fewer unknown waveforms than the CCI algorithm and, thus, provides more usable information for sea-ice freeboard and thickness retrieval. The distinction of leads and thin ice by the UWC algorithm, which are partly seen as leads in the CCI algorithm, reduces the number of sea-surface height observations, but increases their reliability. It should be noted that we define a lead here in the sense of satellite altimetry as an open-water lead, which provides a true sea-surface-height observation without any bias introduced by thin-ice freeboard. The sea-ice thickness bias introduced by using thin-ice freeboard as sea-surface height on the surrounding sea ice is in the order of the thin-ice thickness TIT itself and with a maximum of 25 cm a significant fraction of typical first-year ice thickness. The fact that the CCI algorithm labels a significant portion of the UWC thin-ice waveforms as unknown, demonstrates that these were rightfully excluded from either lead or sea-ice class. The latter sea-ice class is treated as an ice surface, for which range corrections for the full climatological snow cover are applied, which would also result in range biases. The distinction

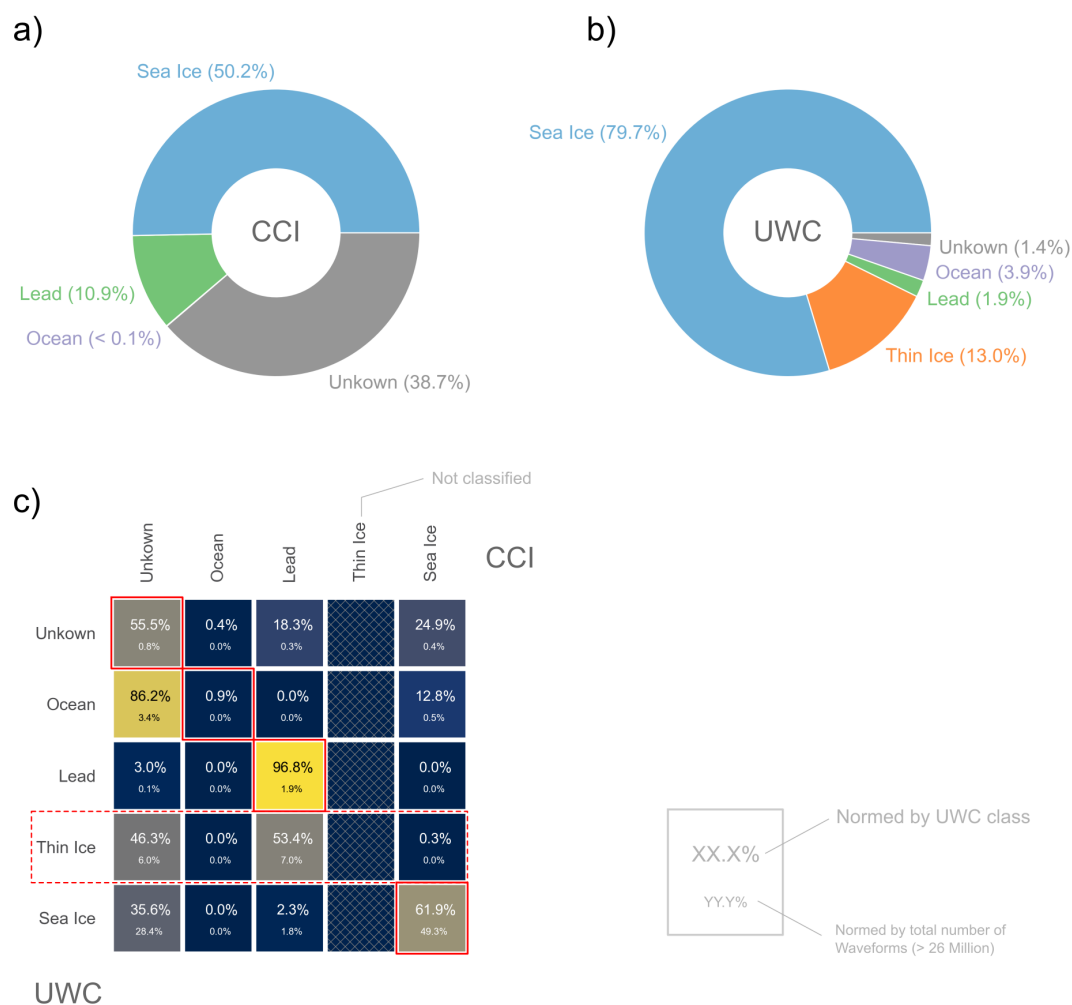

**Figure 9.** Surface-type-classification statistics of CryoSat-2 data for the Arctic Laptev Sea region (Fig. 1) for a) the ESA Climate Change Initiative (CCI) algorithm described in Paul et al. (2018), b) the unsupervised waveform classification (UWC) of this study and c) the classification matrix. The color coding of the classification matrix and upper percent values describes the distribution of UWC classes within CCI classes for each class combination. The lower percent values describes the fraction of the total number of waveforms in the comparison (> 26 million) in class combinations. The CCI surface type classification does not contain a thin ice class.

380 between open-water lead and thin-ice classes, therefore, introduces the possibility to improve both, the sea-surface height and radar freeboard retrieval.



Finally, it must be noted that the official definition of the World Meteorological Organisation (WMO) for the term lead includes thin ice with a thickness of up to 30 cm (WMO, 2014). To obtain lead fractions according the WMO definition, or to compare lead fractions with other remote sensing data, the thin-ice class may be added to the open-water lead class.

## 385 5 Summary and outlook

In the context of an increasing number of open-water areas and sea-ice thinning, which have a major impact on the energy exchange between the atmosphere, the upper-ocean layer and on sea-ice dynamics in the Arctic Ocean (e.g. Persson and Vihma (2017)), this study investigated the thin-ice detection capabilities of CryoSat-2 through comparison of altimetry-derived thin-ice surface detections and ~~thin-ice thickness~~ TIT information from MODIS thermal-infrared imagery. In addition, the study  
390 benefits from spatially and temporally consistent comparisons of three different remote-sensing techniques for continuous monitoring of the Arctic Ocean.

An unsupervised waveform classification approach (Dettmering et al.; Müller et al., 2017), mainly developed to identify open-water targets such as leads and polynyas within the otherwise ice-covered ocean, is adopted to distinguish thin-ice from water and thicker ice. Here, waveform clusters have been assigned to be of thin-ice type due to their resemblance to lead-type  
395 CryoSat-2 waveform echoes, but with ~~in-general~~ less distinctness. These labeled CryoSat-2 observations are compared to thin-ice estimates up to 25cm of thickness derived from MODIS thermal-imagery (Paul et al., 2015), to Sentinel-1 SAR images, to SMOS results (Tian-Kunze et al., 2014), as well as to an external classification approach (Paul et al., 2018; Hendricks et al., 2021).

A visual comparison shows ~~an in-general~~ good agreement between the classified CryoSat-2 altimeter data and both, the  
400 Sentinel-1A/B SAR images as well as the MODIS-derived thin-ice areas despite different spatial resolutions as well as the varying delay in acquisition times between all sensors. However, especially the interpretation of the SAR images without ground-truth validation can be challenging in thin-ice areas due to a large variety of present surface conditions ranging from smooth or slushy areas (with low backscatter returns) to areas covered with frost flowers (with high backscatter returns). The latter also affects the CryoSat-2 radar reflections, since higher surface roughness conditions result in a more sea-ice-like wave-  
405 form shape with increased noise and weaker peak power. This potentially results in a sea-ice group assignment. Despite the substantial difference in spatial resolution between CryoSat-2 and MODIS, the majority of lead and thin-ice assigned CryoSat-2 observations are located in regions with very thin thin-ice. In case of SAR data, CryoSat-2 can help to bring thin-ice and lead-type information to a larger scale without the need to deal with substantial amounts of data and complicated processing chains. With regards to MODIS, the CryoSat-2 thin-ice and lead-type can help to identify sub-pixel scale information from  
410 MODIS that results from spectral mixing of different surfaces within a single pixel.

In addition, a comparison was made between the CryoSat-2 waveform classification and SMOS-derived sea-ice thicknesses. For this purpose, the CryoSat-2 surface classifications were grouped into bins with a length of 12.5 km. Similar to MODIS, there is generally good agreement between thin-ice regions and thin-ice classifications. However, the coarse pixel resolution and the daily averaging of SMOS observations do not allow deeper investigations. Moreover, it is shown that SMOS cannot

415 resolve fine re-frozen lead structures. In contrast, sea-ice classifications also show up in SMOS-derived thin-ice regions. The reason for this might either be the focus of the unsupervised classification on re-frozen leads or the low resolution of SMOS, which does not allow to resolve isolated parts of thicker drift ice. This fact brings the future task to check further waveform clusters regarding possible thin-ice detections. In this context the impact of wind and wave movements in thin-ice area has to be investigated, which can likely cause a widening of the waveform while keeping a higher backscatter power.

420 A quantitative comparison of CryoSat-2 waveform-derived shape and power features and MODIS-derived ~~thin-ice thickness~~ TIT shows a strong linear dependency with increasing ~~thin-ice thickness~~ TIT, a finding that can be exploited for directly estimating sea-ice thickness in a thickness regime where the freeboard-based approach lacks sensitivity. At a minimum it brings the opportunity to use this information for adjusting retracker algorithms, such as for example the Threshold First Maximum Retracker Algorithm (TFMRA, Helm et al. (2014)) to thin-ice conditions and to modify assumptions of snow cover in these  
425 cases. It is also feasible that the obtained information can help to develop a correction term for altimeter ranges for thin-ice waveforms based on the estimated thickness and well-known density of young sea ice for precise sea-level estimation in thin-ice leads and open-water leads alike. Moreover, to enable further Arctic climate-relevant investigations using altimetry data the presented classification of thin-ice can be extended to the entire Arctic Ocean including its peripheral seas and marginal ice zone to produce maps of altimetry-derived thin-ice coverage.

430 *Data availability.* CryoSat-2 Baseline-D L1B data (ESA, 2019) are freely available from the CryoSat-2 science server <https://science-pds.cryosat.esa.int> (last access: October, 2021). ESA Copernicus Sentinel-1A/B Level-1 data is publicly available from ASF DAAC, (<https://search.asf.alaska.edu/>, last-access: October, 2021). MODIS Level 1B calibrated radiances obtained from the MODIS sensors on board the polar-orbiting NASA satellites Terra and Aqua (MOD/MYD02; MODIS Characterization Support Team (MCST), 2017a, b) are freely available from the Level-1 and Atmosphere Archive and Distribution System (LAADS) Distributed Active Archive Center (DAAC) at  
435 <https://ladsweb.modaps.eosdis.nasa.gov/>, (last access: July, 2021). SMOS sea ice thickness from 2014-03-23 and 2017-03-30 were obtained from <https://www.meereisportal.de> (grant: REKLIM-2013-04, last-access: March, 2022).

*Sample availability.* The MODIS image IDs of the comparisons are given out in a list upon request.

*Author contributions.* FM developed the classification approach and conducted major parts of the comparison. SP designed and performed the thin-ice thickness estimation from MODIS thermal-infrared imagery. FM and SP drafted the original manuscript. SH contributed to the  
440 quantitative comparison and writing of the manuscript and supported the study with discussions and comments. DD supported the study with discussions of the applied methods and results and reviewed the manuscript.

*Competing interests.* The authors declare no conflict of interests.

*Acknowledgements.* The authors want to thank the LAADS DAAC and the ASF DAAC for the provision of the MOD/MYD02 and S1-A/B data as well as the ECMWF and the CDS for the provision of the necessary ERA5 reanalysis data at no cost. Moreover, they want to  
445 thank ESA for operating and managing the Earth Explorer Opportunity Mission CryoSat-2. The production of the here-used SMOS sea-ice-thickness data was funded by the ESA project SMOS & CryoSat-2 Sea Ice Data Product Processing and Dissemination Service, and data from 2014-03-23 and 2017-03-30 obtained from <https://www.meereisportal.de> (grant: REKLIM-2013-04).

This work was supported by the Technical University of Munich (TUM) in the framework of the Open Access Publishing Program.

## References

- 450 SEA ICE NOMENCLATURE, [https://library.wmo.int/index.php?lvl=notice\\_display&id=6772](https://library.wmo.int/index.php?lvl=notice_display&id=6772), lastaccess April 29, 2022, 2014.
- Adams, S., Willmes, S., Schröder, D., Heinemann, G., Bauer, M., and Krumpen, T.: Improvement and sensitivity analysis of thermal thin-ice thickness retrievals, *IEEE Transactions on Geoscience and Remote Sensing*, 51, 3306–3318, 2012.
- Aldenhoff, W., Heuzé, C., and Eriksson, L. E. B.: Sensitivity of Radar Altimeter Waveform to Changes in Sea Ice Type at Resolution of Synthetic Aperture Radar, *Remote Sensing*, 11, <https://doi.org/10.3390/rs11222602>, 2019.
- 455 Alexandrov, V., Sandven, S., Wahlin, J., and Johannessen, O. M.: The relation between sea ice thickness and freeboard in the Arctic, *The Cryosphere*, 4, 373–380, <https://doi.org/10.5194/tc-4-373-2010>, 2010.
- Boulze, H., Korosov, A., and Brajard, J.: Classification of Sea Ice Types in Sentinel-1 SAR Data Using Convolutional Neural Networks, *Remote Sensing*, 12, <https://doi.org/10.3390/rs12132165>, 2020.
- Bouzinac, C.: CryoSat-2 Product Handbook Baseline D 1.1 C2-LI-ACS-ESL-5319, European Space Agency, [https://earth.esa.int/eogateway/](https://earth.esa.int/eogateway/documents/20142/37627/CryoSat-Baseline-D-Product-Handbook.pdf)
- 460 documents/20142/37627/CryoSat-Baseline-D-Product-Handbook.pdf, last-access: October, 2021, 2019.
- Celebi, M.: Partitional Clustering Algorithms, EBL-Schweitzer, Springer International Publishing, 2014.
- Dettmering, D., Wynne, A., Müller, F. L., Passaro, M., and Seitz, F.: Lead Detection in Polar Oceans—A Comparison of Different Classification Methods for Cryosat-2 SAR Data, *Remote Sensing*.
- Dierking W.: Sea Ice Monitoring by Synthetic Aperture Radar, *Oceanography*, 26, <http://dx.doi.org/10.5670/oceanog.2013.33>, 2013.
- 465 Dmitrenko, I. A., Tyshko, K. N., Kirillov, S. A., Eicken, H., Hölemann, J. A., and Kassens, H.: Impact of flaw polynyas on the hydrography of the Laptev Sea, *Global and Planetary Change*, 48, 9–27, <https://doi.org/10.1016/j.gloplacha.2004.12.016>, 2005.
- Drinkwater, M. R.: K u band airborne radar altimeter observations of marginal sea ice during the 1984 Marginal Ice Zone Experiment, *Journal of Geophysical Research: Oceans*, 96, 4555–4572, <https://doi.org/10.1029/90JC01954>, 1991.
- Drucker, R., Martin, S., and Moritz, R.: Observations of ice thickness and frazil ice in the St. Lawrence Island polynya from
- 470 satellite imagery, upward looking sonar, and salinity/temperature moorings, *Journal of Geophysical Research: Oceans*, 108, <https://doi.org/10.1029/2001JC001213>, 2003.
- ESA: Cryosat L1b SAR Precise Orbit Baseline D, <https://doi.org/10.5270/cr2-2cnblvi>, 2019.
- Frey, R. A., Ackerman, S. A., Liu, Y., Strabala, K. I., Zhang, H., Key, J. R., and Wang, X.: Cloud Detection with MODIS. Part I: Improvements in the MODIS Cloud Mask for Collection 5, *Journal of Atmospheric and Oceanic Technology*, 25, 1057 – 1072,
- 475 <https://doi.org/10.1175/2008JTECHA1052.1>, 2008.
- Guerreiro, K., Fleury, S., Zakharova, E., Kouraev, A., Rémy, F., and Maisongrande, P.: Comparison of CryoSat-2 and ENVISAT radar freeboard over Arctic sea ice: toward an improved Envisat freeboard retrieval, *The Cryosphere*, 11, 2059–2073, <https://doi.org/10.5194/tc-11-2059-2017>, 2017.
- Helm, V., Humbert, A., and Miller, H.: Elevation and elevation change of Greenland and Antarctica derived from CryoSat-2, *The Cryosphere*,
- 480 8, 1539–1559, <https://doi.org/10.5194/tc-8-1539-2014>, 2014.
- Hendricks, S., Paul, S., and Rinne, E.: ESA Sea Ice Climate Change Initiative (Sea\_Ice\_cci): Northern hemisphere sea ice thickness from the CryoSat-2 satellite on a monthly grid (L3C), v2.0, <https://doi.org/10.5285/FF79D140824F42DD92B204B4F1E9E7C2>, 2018.
- Hendricks, S., Ricker, R., and Paul, S.: Product User Guide & Algorithm Specification: AWI CryoSat-2 Sea Ice Thickness (version 2.4), 2021.

- 485 Hersbach, H., Bell, B., Berrisford, P., Hirahara, S., Horányi, A., Muñoz-Sabater, J., Nicolas, J., Peubey, C., Radu, R., Schepers, D., et al.: The ERA5 global reanalysis, *Quarterly Journal of the Royal Meteorological Society*, 146, 1999–2049, 2020.
- Hollands, T. and Dierking, W.: Dynamics of the Terra Nova Bay Polynya: The potential of multi-sensor satellite observations, *Remote Sensing of Environment*, 187, 30–48, <https://doi.org/10.1016/j.rse.2016.10.003>, 2016.
- Huntemann, M., Heygster, G., Kaleschke, L., Krumpen, T., Mäkynen, M., and Drusch, M.: Empirical sea ice thickness retrieval during the  
490 freeze-up period from SMOS high incident angle observations, *The Cryosphere*, 8, 439–451, <https://doi.org/10.5194/tc-8-439-2014>, 2014.
- Kalnay, E., Kanamitsu, M., Kistler, R., Collins, W., Deaven, D., Gandin, L., Iredell, M., Saha, S., White, G., Woollen, J., Zhu, Y., Chelliah, M., Ebisuzaki, W., Higgins, W., Janowiak, J., Mo, K. C., Ropelewski, C., Wang, J., Leetmaa, A., Reynolds, R., Jenne, R., and Joseph, D.: The NCEP/NCAR 40-Year Reanalysis Project, *Bulletin of the American Meteorological Society*, 77, 437 – 472, [https://doi.org/10.1175/1520-0477\(1996\)077<0437:TNYRP>2.0.CO;2](https://doi.org/10.1175/1520-0477(1996)077<0437:TNYRP>2.0.CO;2), 1996.
- 495 Kurtz, N. T., Galin, N., and Studinger, M.: An improved CryoSat-2 sea ice freeboard retrieval algorithm through the use of waveform fitting, *The Cryosphere*, 8, 1217–1237, <https://doi.org/10.5194/tc-8-1217-2014>, 2014.
- Landy, J. C., Tsamados, M., and Scharien, R. K.: A Facet-Based Numerical Model for Simulating SAR Altimeter Echoes From Heterogeneous Sea Ice Surfaces, *IEEE Transactions on Geoscience and Remote Sensing*, 57, 4164–4180, <https://doi.org/10.1109/TGRS.2018.2889763>, 2019.
- 500 Landy, J. C., Petty, A. A., Tsamados, M., and Stroeve, J. C.: Sea Ice Roughness Overlooked as a Key Source of Uncertainty in CryoSat-2 Ice Freeboard Retrievals, *Journal of Geophysical Research: Oceans*, 125, e2019JC015 820, <https://doi.org/10.1029/2019JC015820>, 2020.
- Laxon, S.: Sea ice altimeter processing scheme at the EODC, *International Journal of Remote Sensing*, 15, 915–924, <https://doi.org/10.1080/01431169408954124>, 1994.
- Laxon, S., Peacock, N., and Smith, D.: High interannual variability of sea ice thickness in the Arctic region, *Nature*, 425, 947–950, 2003.
- 505 Lee, S., Kim, H.-C., and Im, J.: Arctic lead detection using a waveform mixture algorithm from CryoSat-2 data, *The Cryosphere*, 12, 1665–1679, <https://doi.org/10.5194/tc-12-1665-2018>, 2018.
- Mallett, R. D. C., Lawrence, I. R., Stroeve, J. C., Landy, J. C., and Tsamados, M.: Brief communication: Conventional assumptions involving the speed of radar waves in snow introduce systematic underestimates to sea ice thickness and seasonal growth rate estimates, *The Cryosphere*, 14, 251–260, <https://doi.org/10.5194/tc-14-251-2020>, 2020.
- 510 Maykut, G. A.: Energy exchange over young sea ice in the central Arctic, *Journal of Geophysical Research: Oceans*, 83, 3646–3658, <https://doi.org/10.1029/JC083iC07p03646>, 1978.
- Meier, W. N., Hovelsrud, G. K., van Oort, B. E., Key, J. R., Kovacs, K. M., Michel, C., Haas, C., Granskog, M. A., Gerland, S., Perovich, D. K., Makshtas, A., and Reist, J. D.: Arctic sea ice in transformation: A review of recent observed changes and impacts on biology and human activity, *Reviews of Geophysics*, 52, 185–217, <https://doi.org/10.1002/2013RG000431>, 2014.
- 515 Meloni, M., Bouffard, J., Parrinello, T., Dawson, G., Garnier, F., Helm, V., Di Bella, A., Hendricks, S., Ricker, R., Webb, E., Wright, B., Nielsen, K., Lee, S., Passaro, M., Scagliola, M., Simonsen, S. B., Sandberg Sørensen, L., Brockley, D., Baker, S., Fleury, S., Bamber, J., Maestri, L., Skourup, H., Forsberg, R., and Mizzi, L.: CryoSat Ice Baseline-D validation and evolutions, *The Cryosphere*, 14, 1889–1907, <https://doi.org/10.5194/tc-14-1889-2020>, 2020.
- MODIS Characterization Support Team (MCST): MODIS 1km Calibrated Radiances Product, NASA MODIS Adaptive Processing System, Goddard Space Flight Center, Greenbelt, USA, <https://doi.org/10.5067/MODIS/MYD021KM.06>, 2017a.
- 520 MODIS Characterization Support Team (MCST): MODIS 1km Calibrated Radiances Product, NASA MODIS Adaptive Processing System, Goddard Space Flight Center, Greenbelt, USA, <https://doi.org/10.5067/MODIS/MOD021KM.06>, 2017b.

- Morales Maqueda, M. A., Willmott, A. J., and Biggs, N. R. T.: Polynya Dynamics: a Review of Observations and Modeling, *Reviews of Geophysics*, 42, <https://doi.org/10.1029/2002RG000116>, 2004.
- 525 Murashkin, D., Spreen, G., Huntemann, M., and Dierking, W.: Method for detection of leads from Sentinel-1 SAR images, *Annals of Glaciology*, 59, 124–136, <https://doi.org/10.1017/aog.2018.6>, 2018.
- Müller, F. L., Dettmering, D., Bosch, W., and Seitz, F.: Monitoring the Arctic Seas: How Satellite Altimetry Can Be Used to Detect Open Water in Sea-Ice Regions, *Remote Sensing*, 9, <https://doi.org/10.3390/rs9060551>, 2017.
- Onstott, R. G. and Shuchman, R. A.: SAR Measurements of Sea Ice, in: *Synthetic Aperture Radar: Marine User's Manual*, edited by Jackson and Apel, pp. 81–115, US Department of Commerce, National Oceanic and Atmospheric Administration, National Environmental Satellite, Data, and Information Service, Office of Research and Applications, <https://www.sarusersmanual.com/>, 2004.
- 530 Park, J.-W., Korosov, A. A., Babiker, M., Won, J.-S., Hansen, M. W., and Kim, H.-C.: Classification of sea ice types in Sentinel-1 synthetic aperture radar images, *The Cryosphere*, 14, 2629–2645, <https://doi.org/10.5194/tc-14-2629-2020>, 2020.
- Passaro, M., Müller, F. L., and Dettmering, D.: Lead detection using Cryosat-2 delay-doppler processing and Sentinel-1 SAR images, *Advances in Space Research*, 62, 1610 – 1625, <https://doi.org/10.1016/j.asr.2017.07.011>, 2018.
- 535 Passaro, M., Müller, F., and Dettmering, D.: Baltic+ SEAL: Algorithm Theoretical Baseline Document (ATBD), Version 2.1. Technical report delivered under the Baltic+ SEAL project, Tech. rep., ESA, <https://doi.org/10.5270/esa.BalticSEAL.ATBDV2.1>, 2020.
- Passaro, M., Müller, F. L., Oelsmann, J., Rautiainen, L., Dettmering, D., Hart-Davis, M. G., Abulaitijiang, A., Andersen, O. B., Høyer, J. L., Madsen, K. S., Ringgaard, I. M., Särkkä, J., Scarrott, R., Schwatke, C., Seitz, F., Tuomi, L., Restano, M., and
- 540 Benveniste, J.: Absolute Baltic Sea Level Trends in the Satellite Altimetry Era: A Revisit, *Frontiers in Marine Science*, 8, <https://doi.org/10.3389/fmars.2021.647607>, 2021.
- Paul, S., Willmes, S., and Heinemann, G.: Long-term coastal-polynya dynamics in the southern Weddell Sea from MODIS thermal-infrared imagery, *The Cryosphere*, 9, 2027–2041, <https://doi.org/10.5194/tc-9-2027-2015>, 2015.
- Paul, S., Hendricks, S., Ricker, R., Kern, S., and Rinne, E.: Empirical parametrization of Envisat freeboard retrieval of Arctic and Antarctic sea ice based on CryoSat-2: progress in the ESA Climate Change Initiative, *The Cryosphere*, 12, 2437–2460, <https://doi.org/10.5194/tc-12-2437-2018>, 2018.
- 545 Peacock, N. R. and Laxon, S. W.: Sea surface height determination in the Arctic Ocean from ERS altimetry, *Journal of Geophysical Research: Oceans*, 109, <https://doi.org/10.1029/2001JC001026>, 2004.
- Persson, O. and Vihma, T.: The atmosphere over sea ice, in: *Sea Ice*, chap. 6, pp. 160–196, John Wiley Sons, Ltd, <https://doi.org/10.1002/9781118778371.ch6>, 2017.
- 550 Preußner, A., Heinemann, G., Willmes, S., and Paul, S.: Circumpolar polynya regions and ice production in the Arctic: results from MODIS thermal infrared imagery from 2002/2003 to 2014/2015 with a regional focus on the Laptev Sea, *The Cryosphere*, 10, 3021–3042, <https://doi.org/10.5194/tc-10-3021-2016>, 2016.
- Preußner, A., Ohshima, K. I., Iwamoto, K., Willmes, S., and Heinemann, G.: Retrieval of Wintertime Sea Ice Production in Arctic Polynyas Using Thermal Infrared and Passive Microwave Remote Sensing Data, *Journal of Geophysical Research: Oceans*, 124, 5503–5528, <https://doi.org/10.1029/2019JC014976>, 2019.
- 555 Quartly, G. D., Rinne, E., Passaro, M., Andersen, O. B., Dinardo, S., Fleury, S., Guillot, A., Hendricks, S., Kurekin, A. A., Müller, F. L., Ricker, R., Skourup, H., and Tsamados, M.: Retrieving Sea Level and Freeboard in the Arctic: A Review of Current Radar Altimetry Methodologies and Future Perspectives, *Remote Sensing*, 11, <https://doi.org/10.3390/rs11070881>, 2019.

- 560 Reiser, F., Willmes, S., and Heinemann, G.: A New Algorithm for Daily Sea Ice Lead Identification in the Arctic and Antarctic Winter from Thermal-Infrared Satellite Imagery, *Remote Sensing*, 12, <https://doi.org/10.3390/rs12121957>, 2020.
- Ricker, R., Hendricks, S., Helm, V., Skourup, H., and Davidson, M.: Sensitivity of CryoSat-2 Arctic sea-ice freeboard and thickness on radar-waveform interpretation, *The Cryosphere*, 8, 1607–1622, <https://doi.org/10.5194/tc-8-1607-2014>, 2014.
- Ricker, R., Hendricks, S., Kaleschke, L., Tian-Kunze, X., King, J., and Haas, C.: A weekly Arctic sea-ice thickness data record from merged  
565 CryoSat-2 and SMOS satellite data, *The Cryosphere*, 11, 1607–1623, <https://doi.org/10.5194/tc-11-1607-2017>, 2017.
- Riggs, G. A. and Hall, D. K.: MODIS sea ice products user guide to collection 6, National Snow and Ice Data Center, University of Colorado, Boulder, USA, 50 pp., 2015.
- Rinne, E. and Similä, M.: Utilisation of CryoSat-2 SAR altimeter in operational ice charting, *The Cryosphere*, 10, 121–131, <https://doi.org/10.5194/tc-10-121-2016>, 2016.
- 570 Rothrock, D. A., Yu, Y., and Maykut, G. A.: Thinning of the Arctic sea-ice cover, *Geophysical Research Letters*, 26, 3469–3472, <https://doi.org/10.1029/1999GL010863>, 1999.
- Scagliola, M.: CryoSat Footprints (Aresys Technical Note); ESA report no. XCRY-GSEG-EOPG-TN-13-0013, Tech. rep., Noordwijk, Holland: ESA Scientific and Technical Branch ESTEC, 2013.
- Selyuzhenok, V., Krumpen, T., Mahoney, A., Janout, M., and Gerdes, R.: Seasonal and interannual variability of fast ice extent in the southeastern Laptev Sea between 1999 and 2013, *Journal of Geophysical Research: Oceans*, 120, 7791–7806, <https://doi.org/10.1002/2015JC011135>, 2015.  
575
- Tamura, T., Ohshima, K. I., and Nihashi, S.: Mapping of sea ice production for Antarctic coastal polynyas, *Geophysical Research Letters*, 35, <https://doi.org/10.1029/2007GL032903>, 2008.
- Thorndike, A. S., Rothrock, D. A., Maykut, G. A., and Colony, R.: The thickness distribution of sea ice, *Journal of Geophysical Research* (1896-1977), 80, 4501–4513, <https://doi.org/10.1029/JC080i033p04501>, 1975.  
580
- Tian-Kunze, X., Kaleschke, L., Maaß, N., Mäkynen, M., Serra, N., Drusch, M., and Krumpen, T.: SMOS-derived thin sea ice thickness: algorithm baseline, product specifications and initial verification, *The Cryosphere*, 8, 997–1018, <https://doi.org/10.5194/tc-8-997-2014>, 2014.
- Toller, G., Xu, G., Kuyper, J., Isaacman, A., and Xiong, J.: MODIS Level 1B Product User’s Guide, NASA/Goddard Space Flight Center, Greenbelt, USA, 63 pp., 2009.  
585
- Ulander, L. M. H., Carlström, A., and Askne, J.: Effect of frost flowers, rough saline snow and slush on the ERS-1 SAR backscatter of thin Arctic sea-ice, *International Journal of Remote Sensing*, 16, 3287–3305, <https://doi.org/10.1080/01431169508954631>, 1995.
- Wernecke, A. and Kaleschke, L.: Lead detection in Arctic sea ice from CryoSat-2: quality assessment, lead area fraction and width distribution, *The Cryosphere*, 9, 1955–1968, <https://doi.org/10.5194/tc-9-1955-2015>, 2015.
- 590 Willmes, S. and Heinemann, G.: Pan-Arctic lead detection from MODIS thermal infrared imagery, *Annals of Glaciology*, 56, 29–37, 2015.
- Willmes, S. and Heinemann, G.: Sea-ice wintertime lead frequencies and regional characteristics in the Arctic, 2003–2015, *Remote Sensing*, 8, 4, 2016.
- Willmes, S., Krumpen, T., Adams, S., Rabenstein, L., Haas, C., Hoelemann, J., Hendricks, S., and Heinemann, G.: Cross-validation of polynya monitoring methods from multisensor satellite and airborne data: a case study for the Laptev Sea, *Canadian Journal of Remote  
595 Sensing*, 36, S196–S210, <https://doi.org/10.5589/m10-012>, 2010.



Wingham, D., Fran, C., Bouzinac, C., Rostan, D. B. F., Viau, P., and Wallis, D.: CryoSat: A mission to determine the fluctuations in Earth’s land and marine ice fields, *Advances in Space Research*, 37, 841–871, <https://doi.org/10.1016/j.asr.2005.07.027>, natural Hazards and Oceanographic Processes from Satellite Data, 2006.

Yu, Y. and Rothrock, D. A.: Thin ice thickness from satellite thermal imagery, *Journal of Geophysical Research: Oceans*, 101, 25 753–25 766, <https://doi.org/10.1029/96JC02242>, 1996.

Zygmuntowska, M., Khvorostovsky, K., Helm, V., and Sandven, S.: Waveform classification of airborne synthetic aperture radar altimeter over Arctic sea ice, *The Cryosphere*, 7, 1315–1324, <https://doi.org/10.5194/tc-7-1315-2013>, 2013.

Table A1: Shown MODIS scenes in Fig. 5 and Fig. 6, record date and time difference ( $\Delta t$ ) to CryoSat-2 observations in minutes (absolute value).

| MODIS ID                              | Record date | $\Delta t$ [min] |
|---------------------------------------|-------------|------------------|
| MOD03.A2014022.1250.061.2017308004553 | 2014-01-22  | 8.5              |
| MYD03.A2017031.1730.061.2018029032056 | 2017-01-31  | 9.3              |
| MYD03.A2018060.2300.061.2018061160404 | 2018-03-01  | 6.9              |

Table A2: Shown SAR images in Fig. 4 and Fig. 6, record date and time difference ( $\Delta t$ ) to CryoSat-2 observations in minutes (absolute value).

| SAR image ID                                                        | Record date | $\Delta t$ [min] |
|---------------------------------------------------------------------|-------------|------------------|
| S1B_EW_GRDM_1SDH_20180211T231533_20180211T231633_009582_01143A_7062 | 2018-02-11  | 1                |
| S1A_EW_GRDM_1SDH_20180218T221829_20180218T221929_020667_02365D_58AE | 2018-02-18  | 2                |
| S1A_EW_GRDM_1SDH_20180301T231607_20180301T231707_020828_023B73_E32D | 2018-03-01  | 24               |

**Table A3.** Pearson linear correlation coefficients between features and thin-ice thickness (Figure 8). Features: Maximum Power (MP), Waveform Width (Wwidth), LES (Leading-Edge Slope), TES (Trailing-Edge Slope), Wdecay (Waveform decay), WfitMAD (median absolute deviation of fitted waveform), LEW (Leading-Edge-Width, LEP (Leading-Edge-Peakiness)

| Feature     | MP    | Wwidth | LES  | TES  | Wdecay | WfitMAD | LEW  | LEP   |
|-------------|-------|--------|------|------|--------|---------|------|-------|
| Correlation | -0.96 | 0.99   | 0.30 | 0.94 | 0.94   | -0.97   | 0.92 | -0.94 |
